# Supplementary material
Source: PubMed Central journal article supplement (PMC3348587)
Supplement: NIHMS338893-supplement-supplement_1.pdf [file NIHMS338893-supplement-supplement_1.pdf]

## Appendix

**Supplemental Table.** Comparisons between participants with treadmill stress tests at baseline only or at baseline and year 3

|                           | Only baseline |         |        | Baseline and year 3 |         |        | P    |
|---------------------------|---------------|---------|--------|---------------------|---------|--------|------|
|                           | n             | Mean    | SD     | n                   | Mean    | SD     |      |
| Age                       | 227           | 42.1    | 11.7   | 370                 | 44.1    | 11.3   | .044 |
| Cigarettes/day            | 228           | 21.1    | 8.14   | 371                 | 20.4    | 8.46   | .306 |
| Pack-years                | 227           | 26.5    | 19.0   | 371                 | 26.8    | 19.1   | .863 |
| Resting HR                | 227           | 71.6    | 12.1   | 371                 | 72.1    | 11.1   | .645 |
| Exercise peak HR          | 228           | 151.8   | 22.0   | 371                 | 153.7   | 20.4   | .290 |
| Exercise maximum METS     | 225           | 8.75    | 2.48   | 368                 | 8.66    | 2.18   | .671 |
| Exercise peak RPP         | 194           | 12061.5 | 7166.0 | 315                 | 11653.4 | 6832.4 | .521 |
| Exercise peak HR increase | 227           | 80.3    | 22.3   | 370                 | 81.5    | 20.0   | .480 |
| Exercise HR reserve       | 227           | 0.853   | 0.097  | 369                 | 0.873   | 0.094  | .014 |
| Exercise HR recovery      | 96            | 23.0    | 11.0   | 178                 | 21.8    | 11.5   | .419 |

  

|                                      | Only baseline |      | Baseline and year 3 |      | P    |
|--------------------------------------|---------------|------|---------------------|------|------|
|                                      | n             | %    | n                   | %    |      |
| Sex                                  |               |      |                     |      | .344 |
| Male                                 | 96            | 42.1 | 141                 | 37.9 |      |
| Female                               | 132           | 57.9 | 231                 | 62.1 |      |
| Marital status                       |               |      |                     |      | .094 |
| Married                              | 87            | 38.2 | 186                 | 50.3 |      |
| Divorced                             | 58            | 41.7 | 81                  | 58.3 |      |
| Widowed                              | 8             | 3.5  | 9                   | 2.2  |      |
| Separated                            | 7             | 3.1  | 7                   | 1.9  |      |
| Never married                        | 44            | 19.3 | 53                  | 14.3 |      |
| Not married, but living with partner | 24            | 10.5 | 35                  | 9.5  |      |
| Education                            |               |      |                     |      | .279 |
| Grades 9-11                          | 6             | 2.6  | 7                   | 1.9  |      |
| High school graduate                 | 48            | 21.1 | 78                  | 21.2 |      |
| College 1-3 y                        | 126           | 55.3 | 181                 | 49.2 |      |
| College 4 y or more                  | 48            | 21.1 | 102                 | 27.7 |      |
| Race                                 |               |      |                     |      | .689 |
| White                                | 216           | 95.2 | 353                 | 95.1 |      |
| African American                     | 6             | 2.6  | 11                  | 3.0  |      |
| American Indian                      | 1             | 0.40 | 0                   | 0.0  |      |
| Alaska native                        | 0             | 0.0  | 1                   | 0.30 |      |
| Asian/Pacific Island                 | 0             | 0.0  | 1                   | 0.30 |      |
| Other                                | 4             | 1.8  | 5                   | 1.3  |      |

Abbreviations as in Table 1.
